# Supplementary material for: Mussel larvae modify calcifying fluid carbonate chemistry to promote calcification
Source: PubMed Central journal article supplement (PMC5700083; doi:10.1038/s41467-017-01806-8), 2017-11-22
Supplement: 41467_2017_1806_MOESM1_ESM.pdf [file 41467_2017_1806_MOESM1_ESM.pdf]

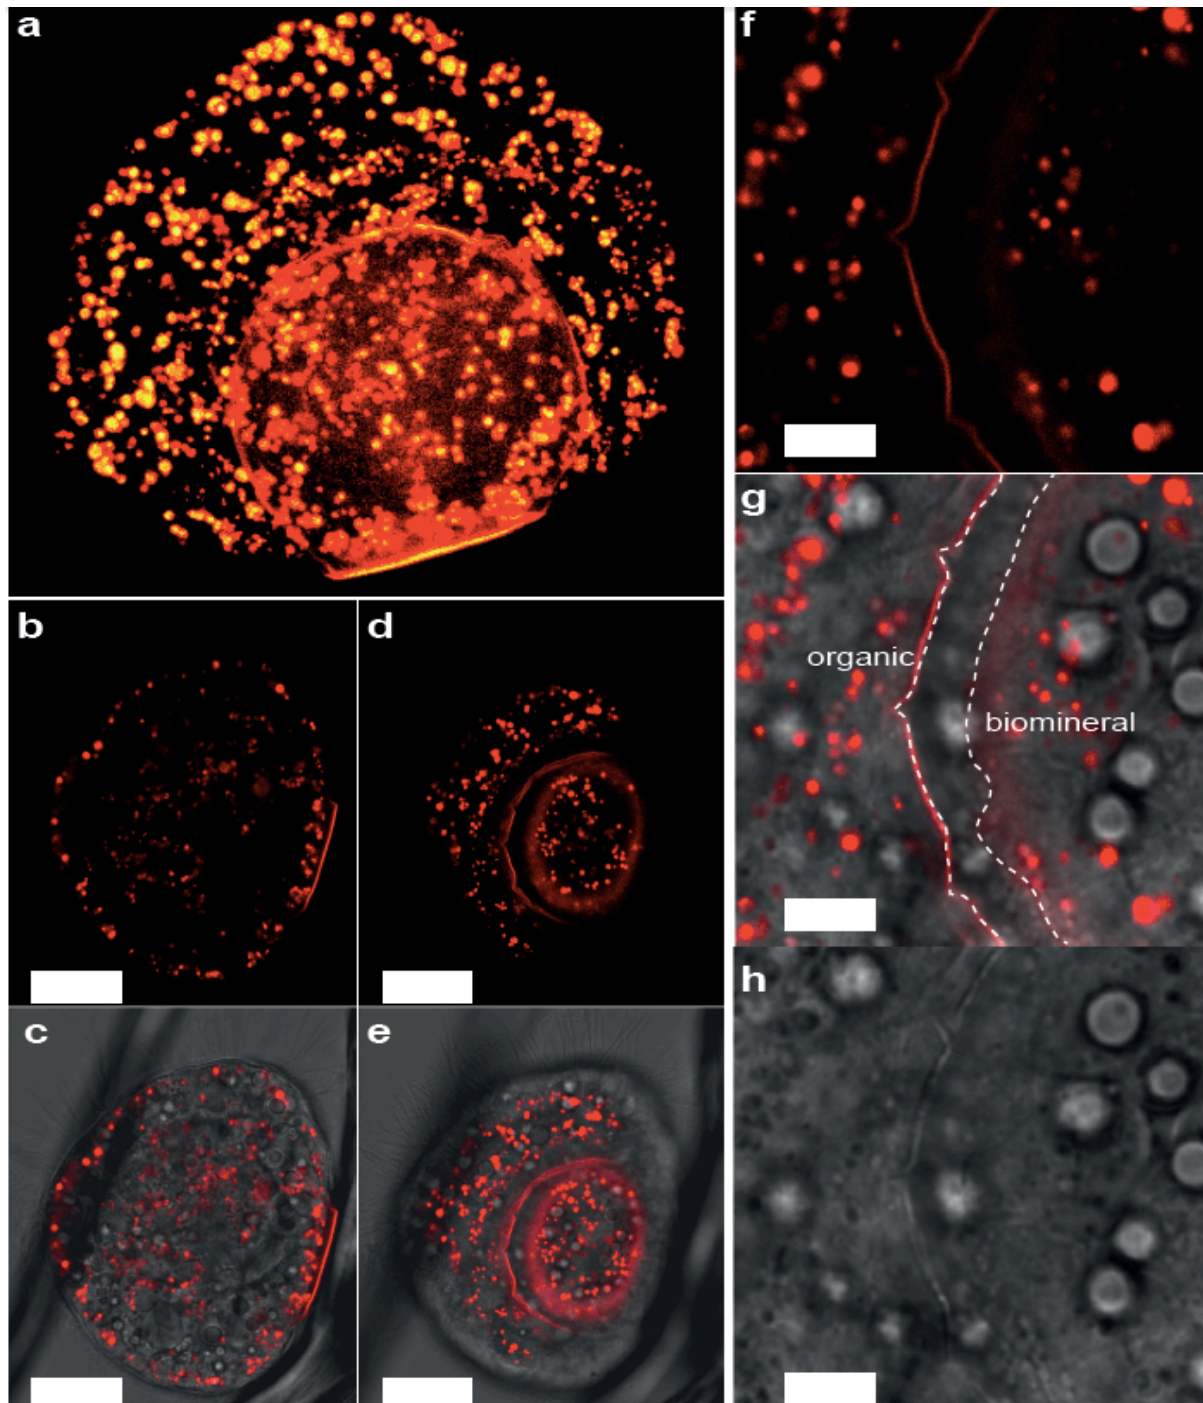

**Supplementary Figure 1. Shell organic cover autofluorescence images.** (a) Confocal projection of unstained 27hpf larva imaged at high laser intensity and using a long – pass filter (LP 505 nm) instead of the band – pass filter (BP 505-530 nm) used for calcein imaging. Autofluorescence of shell organic cover and of numerous vesicles is visible; (b) confocal section illustrating autofluorescence of organic portion of hinge. The hinge is not calcified at this point of time (see Fig. 1) (c) same larva, merged transmission and fluorescence images (d) same larva, different optical plane to illustrate organic shell cover; (e) same larva, merged transmission and fluorescence images (f, g, h) same larva, close – up of shell margin fluorescence (f), merged fluorescence and transmission images (g) and transmission light

image (h). Organic shell cover and organic shell matrix are fluorescent and illustrate the ca. 3-5  $\mu\text{m}$  gap between growing edges of organic vs. biomineral phases. Scale bars: 20  $\mu\text{m}$  (b,c,d,e), 5  $\mu\text{m}$  (f,g,h).

**Supplementary Table 1. Seawater carbonate chemistry parameters calculated from  $C_T$  and  $pH_{NBS}$  using CO2SYS.** Carbonate chemistry measurements were obtained once for each fertilization / experimental run. The last three columns indicate, which measurements were conducted with the respective experimental runs (a: for Fig. 3 and 4 (microsensors), b: for Fig. 5 (shell length), c: for Fig. 5 (shell dissolution)).

| Exp     | Sal. (psu) | Temp. (°C) | Treatment | $C_T$ ( $\mu\text{mol/kg SW}$ ) | $pH_{NBS}$ | $pCO_2$ ( $\mu\text{atm}$ ) | $A_T$ ( $\mu\text{mol/kg SW}$ ) | $CO_3^{2-}$ ( $\mu\text{mol/kg SW}$ ) | $\Omega_{\text{arag}}$ | a | b | c |
|---------|------------|------------|-----------|---------------------------------|------------|-----------------------------|---------------------------------|---------------------------------------|------------------------|---|---|---|
| Exp 3_1 | 15.1       | 16.5       | 1         | 1915.83                         | 8.19       | 445                         | 2018.91                         | 94.66                                 | 1.52                   | X |   |   |
|         | 15.1       | 16.5       | 2         | 1955.05                         | 8.07       | 607                         | 2026.11                         | 74.44                                 | 1.19                   | X |   |   |
|         | 15.1       | 16.5       | 3         | 1994.27                         | 7.86       | 1020                        | 2013.69                         | 46.71                                 | 0.75                   | X |   |   |
|         | 15.1       | 16.5       | 4         | 2042.31                         | 7.73       | 1398                        | 2032.53                         | 35.68                                 | 0.57                   | X |   |   |
|         | 15.1       | 16.5       | 5         | 2045.25                         | 7.64       | 1721                        | 2014.06                         | 28.89                                 | 0.46                   | X |   |   |
| Exp 3_2 | 15.0       | 16.5       | 1         | 2008.59                         | 8.14       | 534                         | 2098.89                         | 88.09                                 | 1.41                   | X | X |   |
|         | 15.0       | 16.5       | 2         | 2033.09                         | 8.04       | 687                         | 2096.73                         | 71.59                                 | 1.15                   | X | X |   |
|         | 15.0       | 16.5       | 3         | 2055.64                         | 7.86       | 1054                        | 2074.63                         | 47.85                                 | 0.77                   | X | X |   |
|         | 15.0       | 16.5       | 4         | 2083.09                         | 7.61       | 1879                        | 2043.21                         | 27.24                                 | 0.44                   | X | X |   |
|         | 15.0       | 16.5       | 5         | 2088.97                         | 7.40       | 3004                        | 1990.86                         | 16.56                                 | 0.27                   | X | X |   |
| Exp 3_3 | 14.8       | 16.5       | 1         | 1903.7                          | 8.12       | 528                         | 1984.40                         | 79.58                                 | 1.27                   | X | X |   |
|         | 14.8       | 16.5       | 2         | 1938.99                         | 8.01       | 693                         | 1992.87                         | 63.74                                 | 1.02                   | X | X |   |
|         | 14.8       | 16.5       | 3         | 1986.04                         | 7.77       | 1229                        | 1985.66                         | 37.96                                 | 0.61                   | X | X |   |
|         | 14.8       | 16.5       | 4         | 2010.55                         | 7.66       | 1602                        | 1984.70                         | 29.68                                 | 0.48                   | X | X |   |
|         | 14.8       | 16.5       | 5         | 2018.39                         | 7.60       | 1842                        | 1978.15                         | 25.88                                 | 0.41                   | X | X |   |
| Exp 3_4 | 13.8       | 16.5       | 1         | 1917.55                         | 8.16       | 474                         | 2004.39                         | 84.45                                 | 1.35                   | X | X |   |
|         | 13.8       | 16.5       | 2         | 1956.65                         | 8.09       | 572                         | 2025.49                         | 73.53                                 | 1.18                   | X | X |   |
|         | 13.8       | 16.5       | 3         | 1982.23                         | 7.81       | 1112                        | 1986.16                         | 39.46                                 | 0.63                   | X | X |   |
|         | 13.8       | 16.5       | 4         | 2040.05                         | 7.66       | 1616                        | 2009.33                         | 28.57                                 | 0.46                   | X | X |   |
|         | 13.8       | 16.5       | 5         | 2038.88                         | 7.59       | 1892                        | 1991.36                         | 24.22                                 | 0.39                   | X | X |   |
| Exp 3_5 | 15.4       | 16.8       | 1         | 1903.70                         | 8.14       | 500                         | 1995.87                         | 87.01                                 | 1.40                   |   | X |   |
|         | 15.4       | 16.8       | 2         | 1938.99                         | 8.00       | 701                         | 1995.66                         | 65.44                                 | 1.05                   |   | X |   |
|         | 15.4       | 16.8       | 3         | 1986.05                         | 7.76       | 1250                        | 1986.99                         | 38.77                                 | 0.62                   |   | X |   |
|         | 15.4       | 16.8       | 4         | 2010.55                         | 7.65       | 1634                        | 1985.46                         | 30.23                                 | 0.49                   |   | X |   |
|         | 15.4       | 16.8       | 5         | 2018.39                         | 7.55       | 2064                        | 1968.32                         | 23.87                                 | 0.38                   |   | X |   |
| Exp 3_6 | 15.2       | 16.8       | 1         | 1899.53                         | 8.16       | 476                         | 1996.34                         | 90.14                                 | 1.45                   |   | X |   |
|         | 15.2       | 16.8       | 2         | 1953.97                         | 8.03       | 666                         | 2016.56                         | 69.35                                 | 1.11                   |   | X |   |
|         | 15.2       | 16.8       | 3         | 2001.23                         | 7.78       | 1220                        | 2004.86                         | 40.15                                 | 0.64                   |   | X |   |
|         | 15.2       | 16.8       | 4         | 2030.44                         | 7.68       | 1555                        | 2010.82                         | 32.29                                 | 0.52                   |   | X |   |
|         | 15.2       | 16.8       | 5         | 2056.19                         | 7.58       | 1974                        | 2011.90                         | 25.86                                 | 0.42                   |   | X |   |
| Exp 4_1 | 14.6       | 16.8       | 1         | 1909.79                         | 8.14       | 507                         | 1997.65                         | 84.70                                 | 1.36                   |   |   | X |
|         | 14.6       | 16.8       | 2         | 1945.37                         | 7.99       | 735                         | 1994.95                         | 61.61                                 | 0.99                   |   |   | X |
|         | 14.6       | 16.8       | 3         | 2009.76                         | 7.77       | 1264                        | 2008.99                         | 38.46                                 | 0.62                   |   |   | X |
|         | 14.6       | 16.8       | 4         | 2030.36                         | 7.69       | 1533                        | 2011.12                         | 32.26                                 | 0.52                   |   |   | X |
|         | 14.6       | 16.8       | 5         | 2059.10                         | 7.57       | 2038                        | 2010.33                         | 24.68                                 | 0.40                   |   |   | X |
|         | 14.6       | 16.8       | 6         | 2084.12                         | 7.47       | 2577                        | 2007.78                         | 19.69                                 | 0.32                   |   |   | X |

**Supplementary Table 2.** Compiled information related to regressions reported in Fig. 4 with N=4 experimental fertilizations and 4-5 treatment levels per fertilization. Regressions were conducted on treatment mean values (all 4 replicate fertilizations). Test for heterogeneity of slopes were conducted using slopes of regressions for individual fertilizations. SW = sea water, CS = calcifying space, x =  $p\text{CO}_2$  in  $\mu\text{atm}$ .

| Parameter                                                  | Compartment | Regression Equation                                      | ANOVA                                                    | P-value          | R <sup>2</sup> | Heterogeneity of Slopes                 | Intercepts                                       |
|------------------------------------------------------------|-------------|----------------------------------------------------------|----------------------------------------------------------|------------------|----------------|-----------------------------------------|--------------------------------------------------|
| pH <sub>NBS</sub>                                          | SW<br>CS    | y = -<br>0.0004x+8.3191<br>y = -<br>0.0006x+8.5765       | F <sub>(1,17)</sub> =303.2<br>F <sub>(1,17)</sub> =516.3 | <0.001<br><0.001 | 0.94<br>0.96   | <b>P=0.01, t=5.2,</b><br><b>df=3</b>    | <b>P=0.001,</b><br><b>t=15.8,</b><br><b>df=3</b> |
| ΔpH <sub>NBS</sub>                                         | CS-SW       | y = -<br>0.0001x+0.2574                                  | F <sub>(1,17)</sub> =139.1                               | <0.001           | 0.89           |                                         |                                                  |
| Δ[H <sup>+</sup> ]<br>nmol kg <sup>-1</sup>                | CS-SW       | y =<br>0.84+4/(1+exp(-<br>(x-1612)/-16.6))               | F <sub>(3,15)</sub> =10.7                                | <0.001           | 0.68           |                                         |                                                  |
| [CO <sub>3</sub> <sup>2-</sup> ]<br>μmol kg <sup>-1</sup>  | SW<br>CS    | y = -<br>43.51ln(x)+350.01<br>y = -<br>48.51ln(x)+395.23 | F <sub>(1,17)</sub> =22.54<br>F <sub>(1,17)</sub> =27.37 | <0.001<br><0.001 | 0.89<br>0.86   | P>0.05, t=0.3,<br>df=3                  | P>0.05,<br>t=2.1,<br>df=3                        |
| Δ[CO <sub>3</sub> <sup>2-</sup> ]<br>μmol kg <sup>-1</sup> |             |                                                          | F <sub>(1,17)</sub> =2.546                               | >0.05            | 0.13           |                                         |                                                  |
| Log<br>Ω <sub>aragonite</sub>                              | SW<br>CS    | y = -<br>0.001x+0.7236<br>y = -<br>0.0013x+1.2994        | F <sub>(1,16)</sub> =263.2<br>F <sub>(1,16)</sub> =468.3 | <0.001<br><0.001 | 0.94<br>0.96   | <b>P&lt;0.05, t=3.7,</b><br><b>df=3</b> | <b>P=0.004,</b><br><b>t=8.0,</b><br><b>df=3</b>  |
| Δlog<br>Ω <sub>aragonite</sub>                             | CS-SW       | y = -<br>0.0004x+0.6595                                  | F <sub>(1,16)</sub> =155.5                               | <0.001           | 0.90           |                                         |                                                  |
| [Ca <sup>2+</sup> ]<br>mmol kg <sup>-1</sup>               | SW<br>CS    |                                                          | F <sub>(1,17)</sub> =0.82<br>F <sub>(1,17)</sub> =0.58   | >0.05<br>>0.05   | 0.04<br>0.03   |                                         |                                                  |
| Δ[Ca <sup>2+</sup> ]<br>mmol kg <sup>-1</sup>              | CS-SW       |                                                          | F <sub>(1,17)</sub> =0.20                                | >0.05            | 0.01           |                                         |                                                  |
