# Supplementary material for: Mussel larvae modify calcifying fluid carbonate chemistry to promote calcification
Source: PubMed Central journal article supplement (PMC5700083; doi:10.1038/s41467-017-01806-8), 2017-11-22
Supplement: 41467_2017_1806_MOESM3_ESM.pdf [file 41467_2017_1806_MOESM3_ESM.pdf]

## **Description of Additional Supplementary Files**

File Name: Supplementary Movie 1

Description: Swimming larvae under crossed polarized light. 24 degree post fertilization (dpf) larvae were filmed free swimming at 100x magnification in a small glass dish filled with a 3 mm deep filtered seawater (FSW) layer at 17°C using an inverted microscope (Leica DMI8). The video demonstrates that the entire shell is birefringent. Length of sequence: 22 seconds. Length of larvae: ca. 70  $\mu\text{m}$ , shell length: ca. 30-40  $\mu\text{m}$ .
